# Supplementary material for: In Silico Identification of Potential Therapeutic Agents for COVID-19 Based on Molecular Docking Study of Main Protease and Receptor Binding Domain of Spike Protein.
Source: Research Square preprint supplement (doi:10.21203/rs.3.rs-285026/v1), 2021-06-28
Supplement: Supplementary file 1 [file 3a8c561a461f245c33353f17.docx]

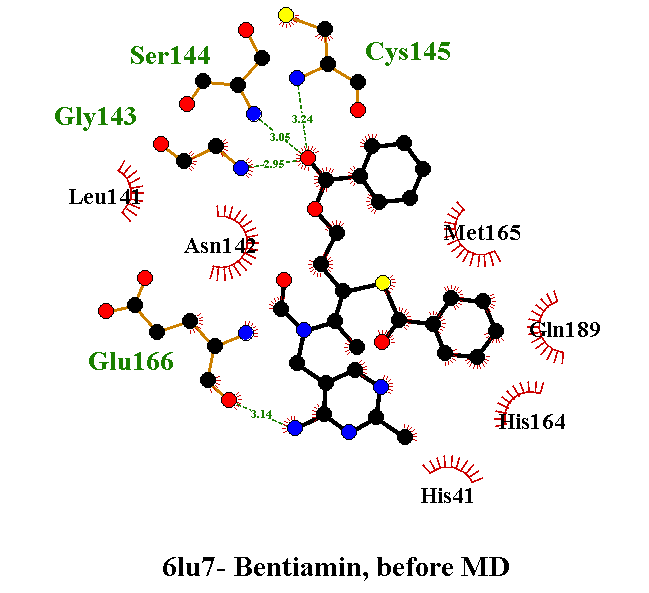

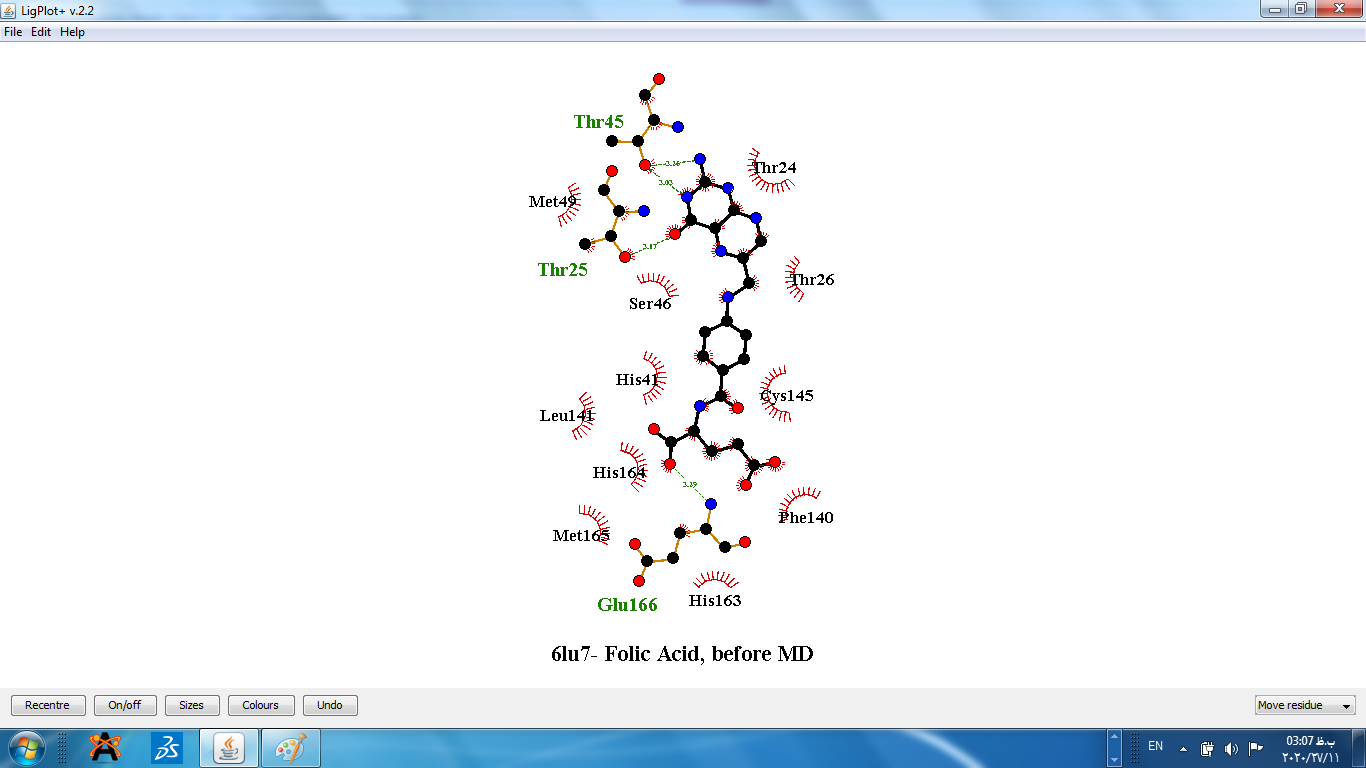

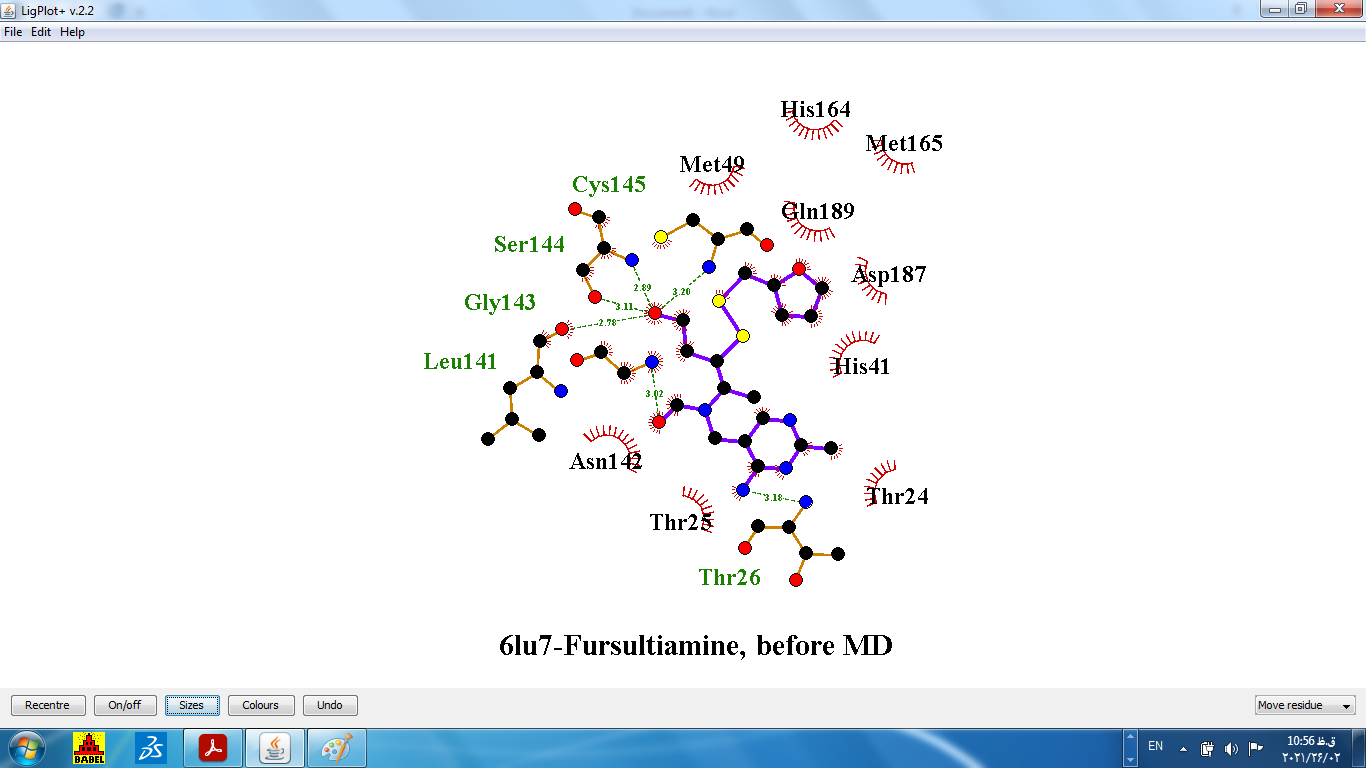

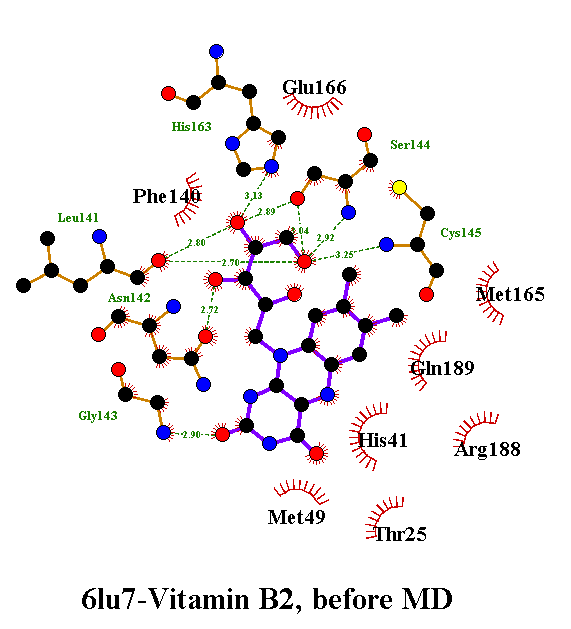

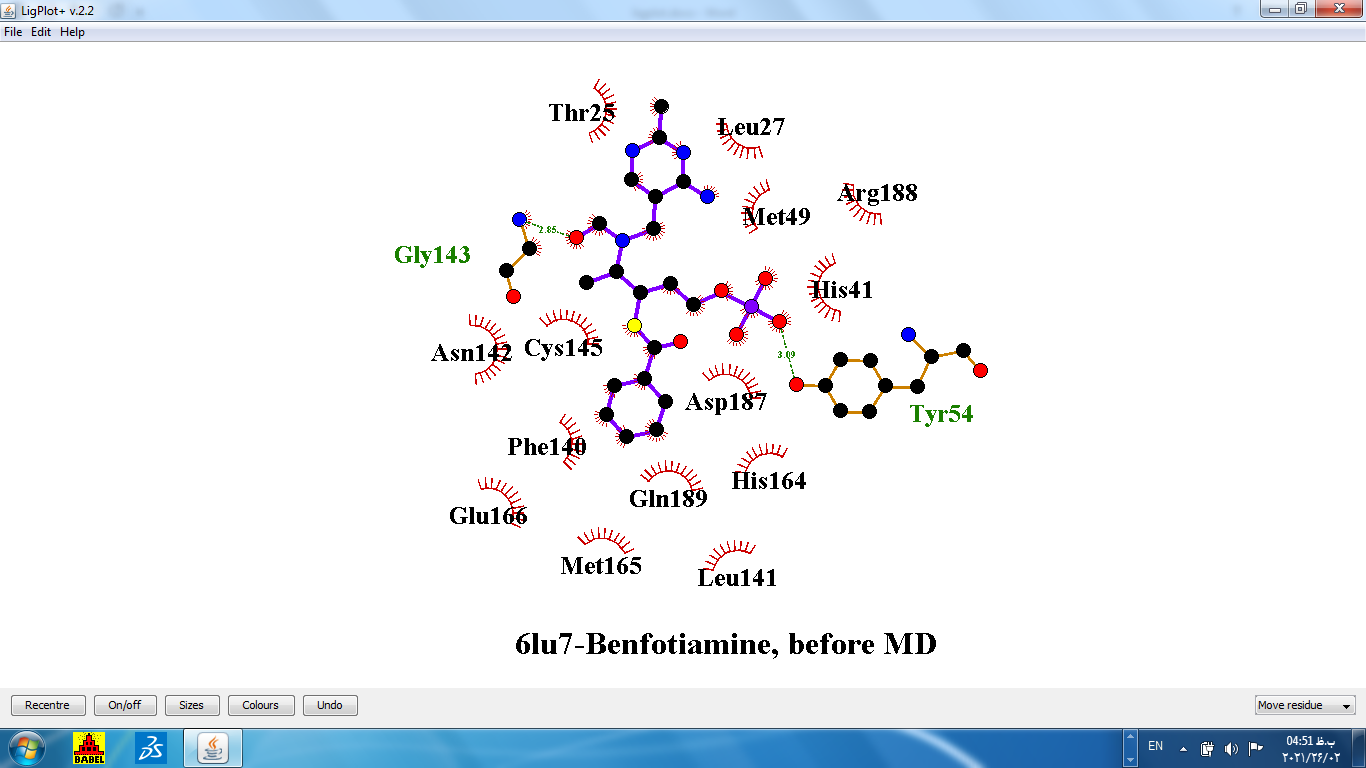

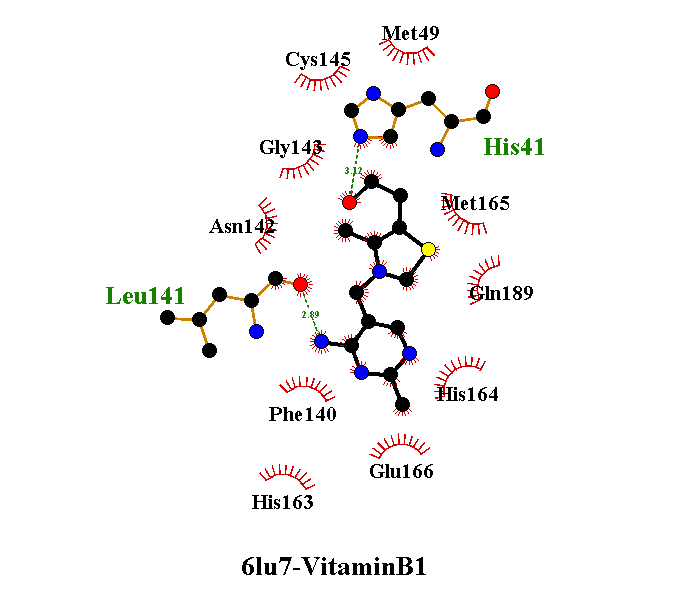

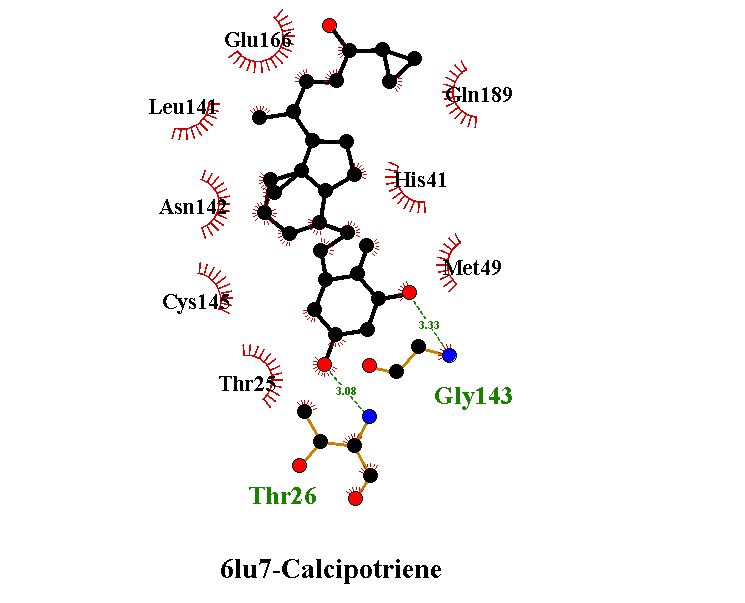

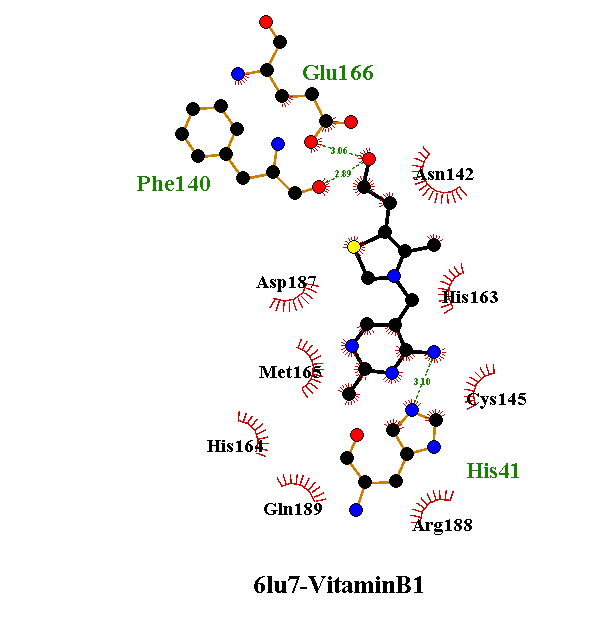

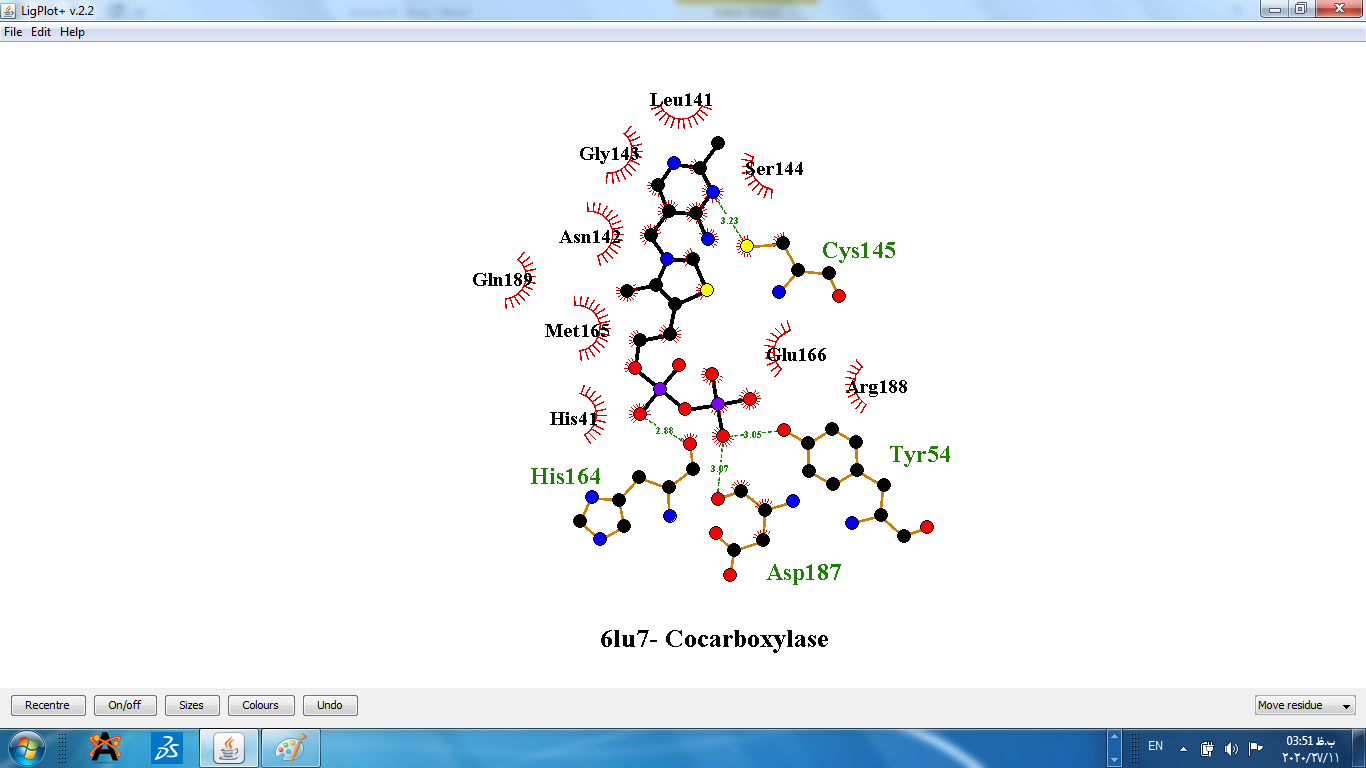

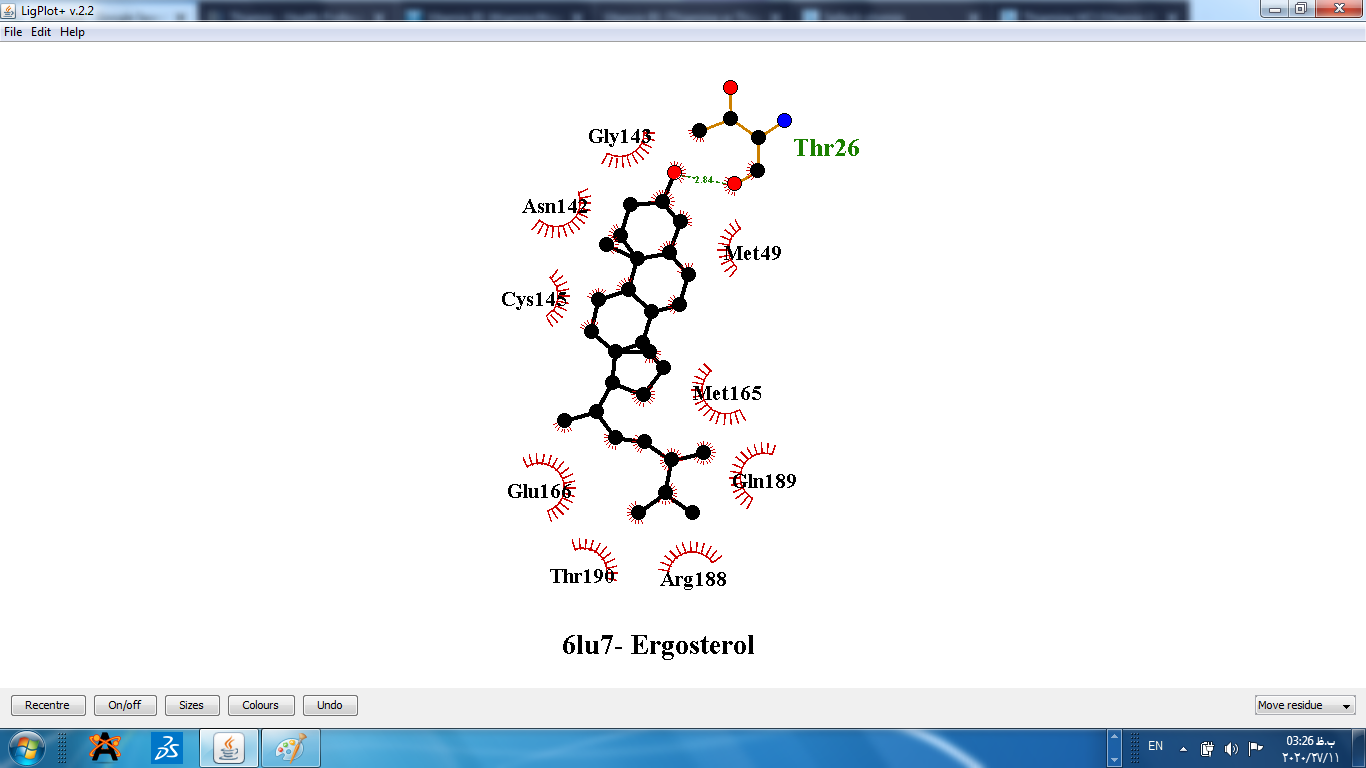

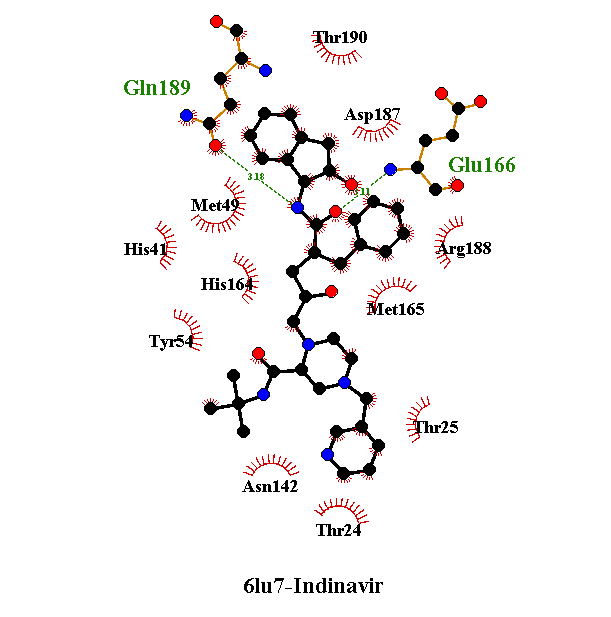


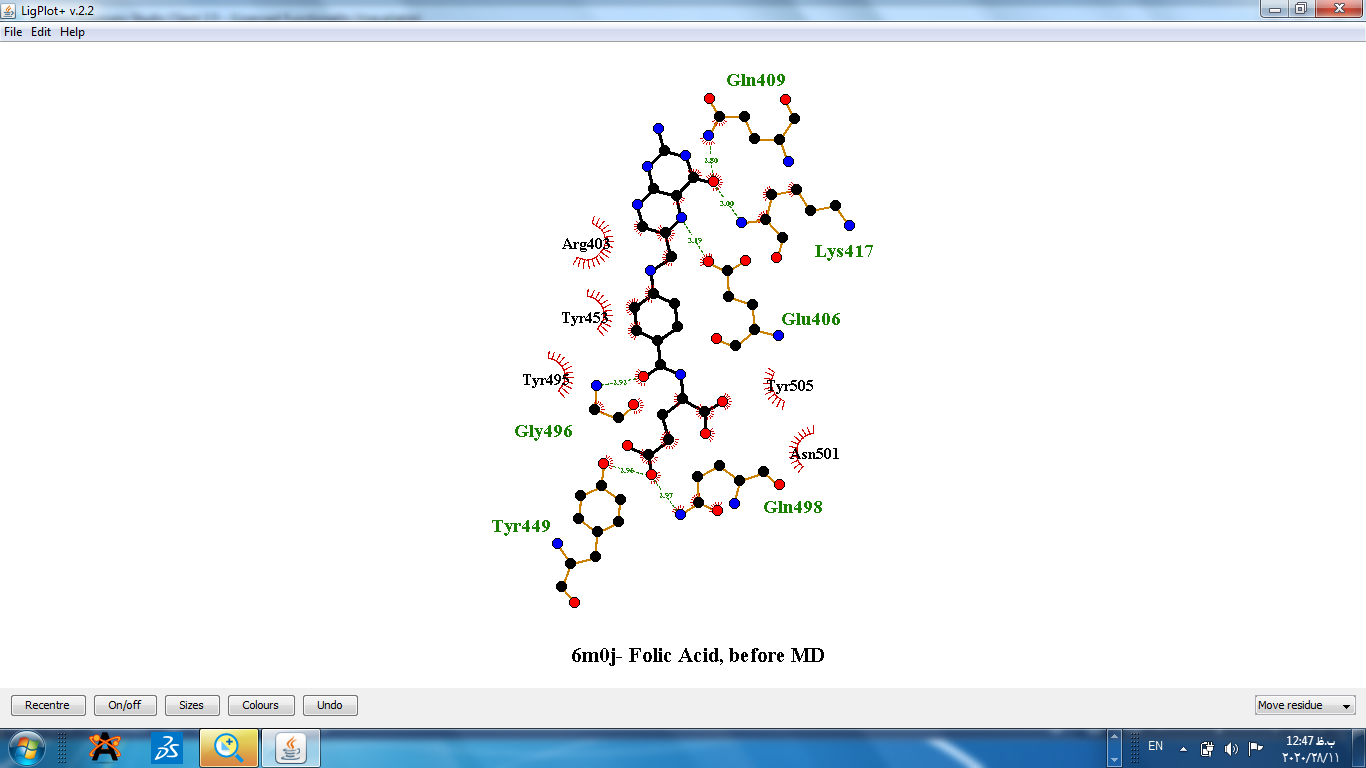

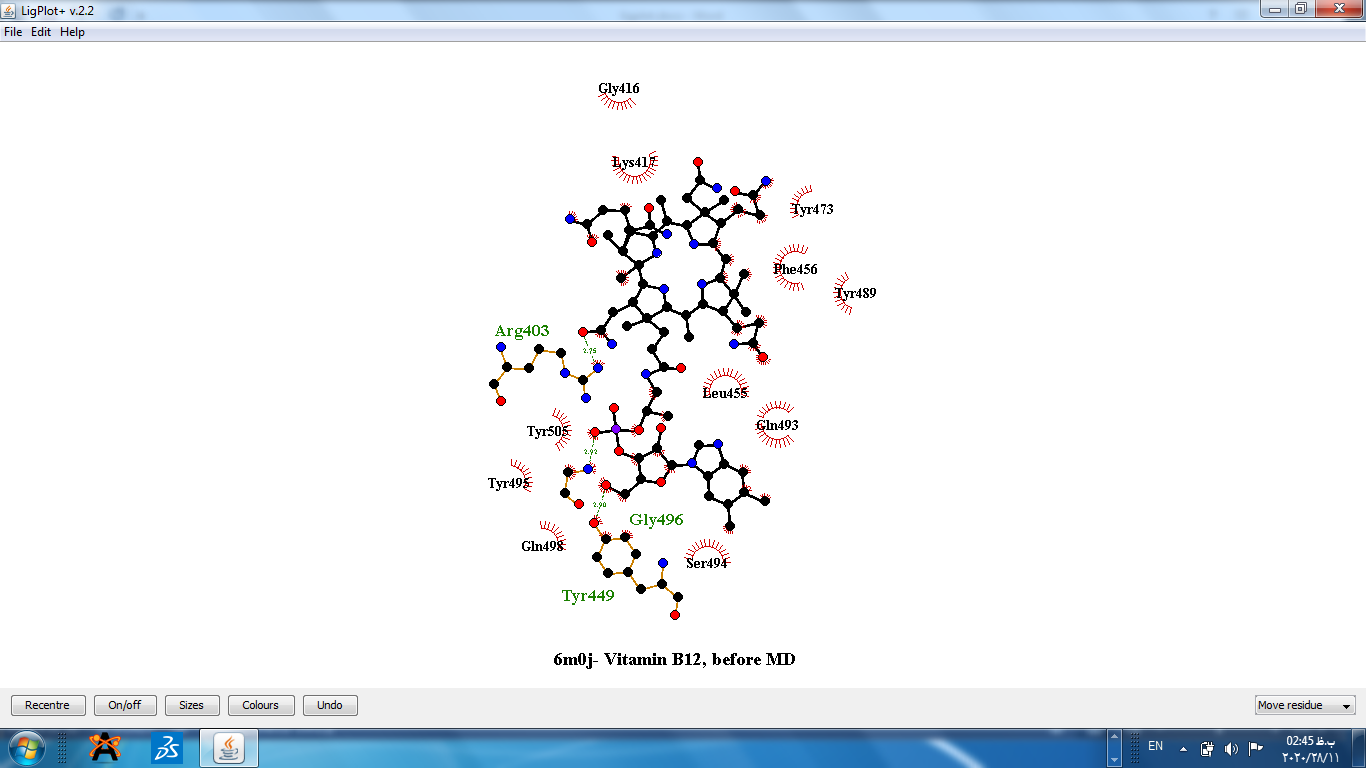

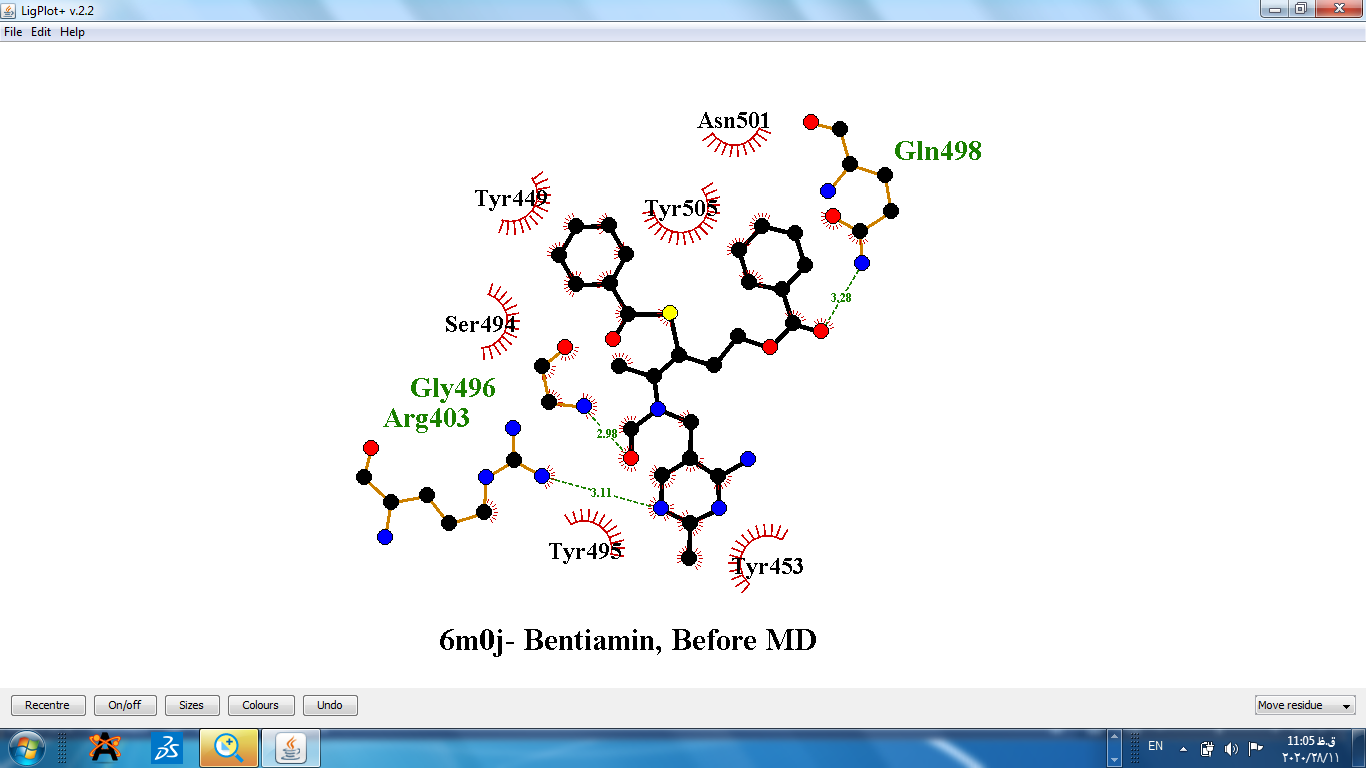


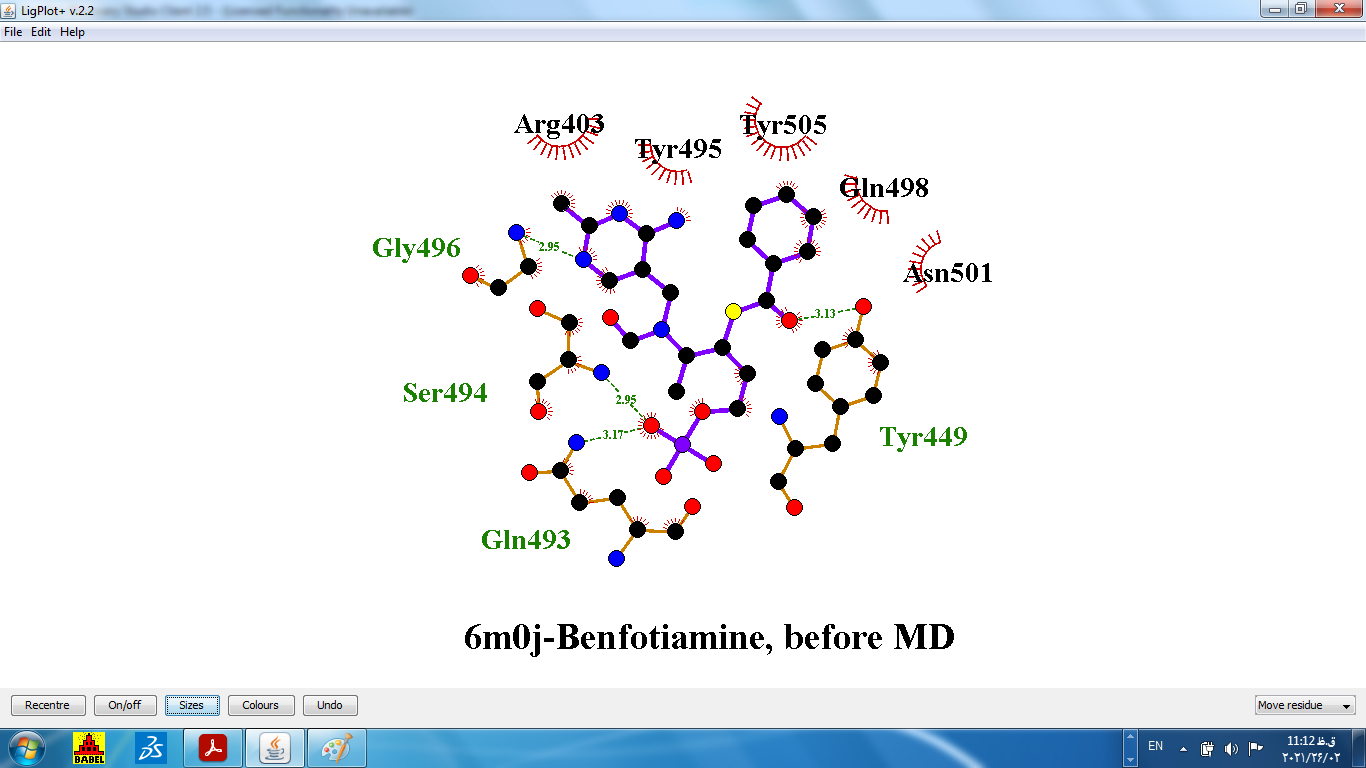


**Supplementary Figure 1:** Ligplot analysis of 6lu7-ligands and 6m0j –ligands interaction without molecular dynamics simulation. Green lines indicate the hydrogen bonds and red dotted lines indicate the hydrophobic interactions.
